# Supplementary material for: Collateral Sensitivity to Fosfomycin of Tobramycin-Resistant Mutants of Pseudomonas aeruginosa Is Contingent on Bacterial Genomic Background
Source: MDPI journal article supplement (doi:10.3390/ijms24086892), 2023-04-07
Supplement: s1 [file s1]

**Table S1.** Concentration of tobramycin (close to MIC) that hindered -but allowed- the growth of each *P. aeruginosa* clinical isolate in glass tube (µg/ml).

| ISOLATE ID | ORIGIN            | ST   | TOBRAMYCIN concentration (µg/ml) used in the ALE experiments |
|------------|-------------------|------|--------------------------------------------------------------|
| AND04-004A | Tracheal aspirate | 244  | 0.4                                                          |
| ARA02-005  | Blood             | 267  | 0.3                                                          |
| BAL02-001  | Sputum            | 1619 | 0.2                                                          |
| BAL04-002  | Blood             | 1816 | 0.3                                                          |
| CAN01-002  | Sputum            | 111  | 0.4                                                          |
| CAN01-003  | Sputum            | 111  | 6                                                            |
| CAT02-004  | Blood             | 244  | 0.2                                                          |
| CAT06-005  | Sputum            | 175  | 6                                                            |
| CAT09-004  | Blood             | 244  | 0.3                                                          |
| CLE03-004  | Tracheal aspirate | 381  | 0.5                                                          |
| CLM01-003  | Sputum            | 709  | 0.3                                                          |
| CVA01-006  | Sputum            | 175  | 12                                                           |
| EXT01-004  | Sputum            | 3353 | 0.8                                                          |
| GAL01-001  | Sputum            | 560  | 0.2                                                          |
| GAL02-004  | Sputum            | 217  | 2                                                            |
| ICA01-004  | Sputum            | 698  | 0.2                                                          |

|                      |             |      |     |
|----------------------|-------------|------|-----|
| <b>MAD04-002</b>     | Sputum      | 242  | 0.3 |
| <b>MAD05-009</b>     | Sputum (CF) | 27   | 0.2 |
| <b>FQSE03-1212-2</b> | Sputum (CF) | 274  | 0.4 |
| <b>FQSE10-0503</b>   | Sputum (CF) | 274  | 0.1 |
| <b>FQSE110603</b>    | Sputum (CF) | 701  | 0.3 |
| <b>FQSE15-0803</b>   | Sputum (CF) | 274  | 0.4 |
| <b>FQSE24-0304</b>   | Sputum (CF) | 1089 | 2   |

ST: sequence type, MIC: Minimal Inhibitory Concentration, CF: cystic fibrosis.

**Table S2.** MICs in µg/ml of tobramycin and fosfomycin in *P. aeruginosa* clinical strains after evolution in presence or absence of tobramycin.

[illegible]

|                      |                 |           |           |           |           |           |           |           |           |
|----------------------|-----------------|-----------|-----------|-----------|-----------|-----------|-----------|-----------|-----------|
| <b>CAT06-005</b>     | <b>parental</b> | <b>C1</b> | <b>C2</b> | <b>C3</b> | <b>C4</b> | <b>E1</b> | <b>E2</b> | <b>E3</b> | <b>E4</b> |
| TOB                  | 32              | 129       | 32        | 24        | 32        | 96        | 96        | 96        | 96        |
| FOF                  | ≥1024           | ≥1024     | ≥1024     | ≥1024     | ≥1024     | ≥1024     | ≥1024     | ≥1024     | ≥1024     |
| <b>CAT09-004</b>     | <b>parental</b> | <b>C1</b> | <b>C2</b> | <b>C3</b> | <b>C4</b> | <b>E1</b> | <b>E2</b> | <b>E3</b> | <b>E4</b> |
| TOB                  | 3               | 2         | 1.5       | 3         | 1         | 8         | 4         | 8         | 8         |
| FOF                  | 64              | 96        | 96        | 128       | 96        | 128       | 96        | 128       | 64        |
| <b>CLM01-003</b>     | <b>parental</b> | <b>C1</b> | <b>C2</b> | <b>C3</b> | <b>C4</b> | <b>E1</b> | <b>E2</b> | <b>E3</b> | <b>E4</b> |
| TOB                  | 2               | 2         | 1.5       | 2         | 3         | 3         | 4         | 6         | 24        |
| FOF                  | 192             | 192       | 192       | 256       | 128       | 128       | 192       | 256       | 256       |
| <b>EXT01-004</b>     | <b>parental</b> | <b>C1</b> | <b>C2</b> | <b>C3</b> | <b>C4</b> | <b>E1</b> | <b>E2</b> | <b>E3</b> | <b>E4</b> |
| TOB                  | 3               | 3         | 3         | 3         | 3         | 12        | 4         | 12        | 4         |
| FOF                  | 2               | 2         | 2         | 2         | 2         | 2         | 1.5       | 2         | 1.5       |
| <b>GAL01-001</b>     | <b>parental</b> | <b>C1</b> | <b>C2</b> | <b>C3</b> | <b>C4</b> | <b>E1</b> | <b>E2</b> | <b>E3</b> | <b>E4</b> |
| TOB                  | 1.5             | 1.5       | 2         | 2         | 0.5       | 8         | 6         | 6         | 6         |
| FOF                  | 32              | 24        | 48        | 48        | 256       | 16        | 48        | 24        | 48        |
| <b>GAL02-004</b>     | <b>parental</b> | <b>C1</b> | <b>C2</b> | <b>C3</b> | <b>C4</b> | <b>E1</b> | <b>E2</b> | <b>E3</b> | <b>E4</b> |
| TOB                  | 6               | 6         | 4         | 6         | 4         | 8         | 8         | 8         | 8         |
| FOF                  | ≥1024           | ≥1024     | ≥1024     | ≥1024     | ≥1024     | ≥1024     | ≥1024     | ≥1024     | ≥1024     |
| <b>ICA01-004</b>     | <b>parental</b> | <b>C1</b> | <b>C2</b> | <b>C3</b> | <b>C4</b> | <b>E1</b> | <b>E2</b> | <b>E3</b> | <b>E4</b> |
| TOB                  | 1.5             | 2         | 1.5       | 1.5       | 1.5       | 3         | 4         | 4         | 3         |
| FOF                  | 48              | 48        | 48        | 32        | 48        | 128       | 128       | 128       | 128       |
| <b>MAD04-002</b>     | <b>parental</b> | <b>C1</b> | <b>C2</b> | <b>C3</b> | <b>C4</b> | <b>E1</b> | <b>E2</b> | <b>E3</b> | <b>E4</b> |
| TOB                  | 3               | 3         | 3         | 3         | 3         | 8         | 8         | 8         | 12        |
| FOF                  | 6               | 12        | 8         | 8         | 12        | 16        | 12        | 16        | 16        |
| <b>FQSE03-1212-2</b> | <b>parental</b> | <b>C1</b> | <b>C2</b> | <b>C3</b> | <b>C4</b> | <b>E1</b> | <b>E2</b> | <b>E3</b> | <b>E4</b> |
| TOB                  | 2               | 4         | 1.5       | 1.5       | 2         | 4         | 4         | 6         | 4         |
| FOF                  | 64              | 96        | 64        | 96        | 64        | 96        | 96        | 96        | 96        |
| <b>FQSE110603</b>    | <b>parental</b> | <b>C1</b> | <b>C2</b> | <b>C3</b> | <b>C4</b> | <b>E1</b> | <b>E2</b> | <b>E3</b> | <b>E4</b> |
| TOB                  | 2               | 4         | 2         | 24        | 8         | 6         | 4         | 8         | 6         |
| FOF                  | 64              | 128       | 256       | 48        | 96        | 96        | 192       | 96        | 128       |

C1-4: the four replicates evolved in absence of tobramycin. E1-E4: the four replicates evolved in presence of tobramycin. TOB: tobramycin, FOF: fosfomycin.

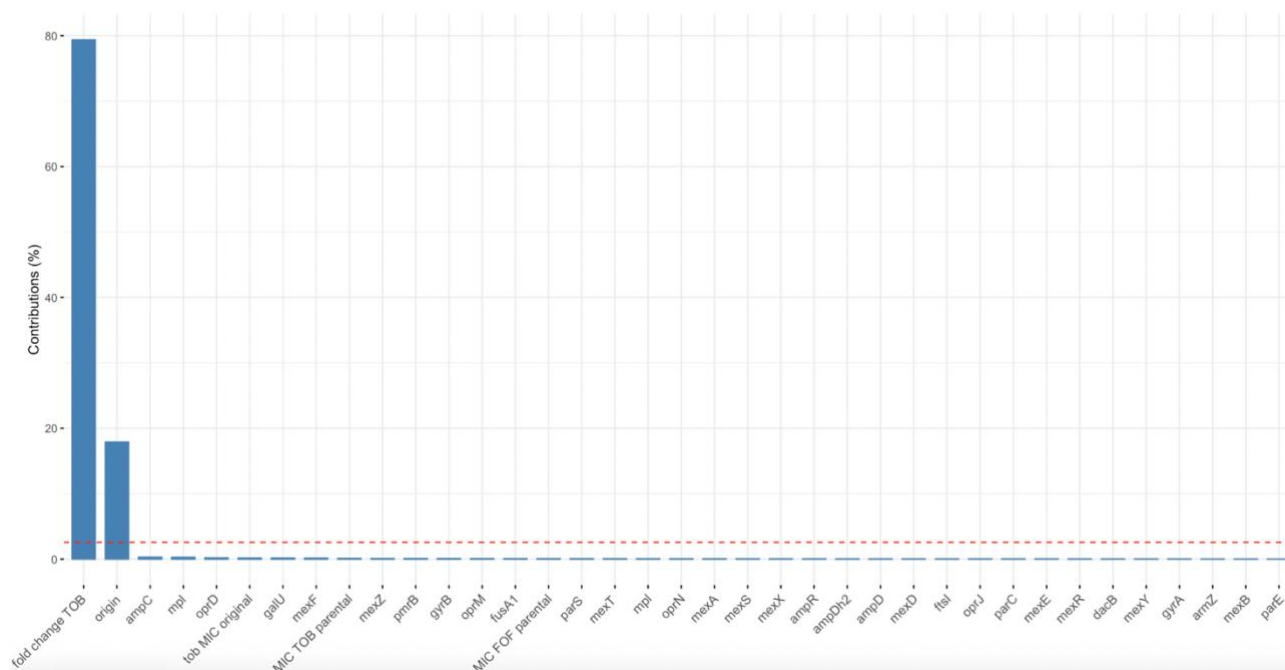

**Figure S1.** Contribution of different variables to the collateral sensitivity to fosfomycin in *P. aeruginosa* clinical isolates. The variables used for the analysis were: the origin of the strains, their resistome-related mutations (Table 1), their capacity of developing collateral sensitivity to fosfomycin, the MIC of the parental strain to tobramycin and fosfomycin, the fold change of these MICs after the ALE, and the tobramycin concentration used to perform said ALE. The MICs for tobramycin and fosfomycin and the tobramycin concentrations used in the ALE were classified as “high” or “low” in order to be introduced in the program as binary code. The parental MIC for fosfomycin was considered “high” if the value was  $\geq 64$   $\mu\text{g/ml}$  and “low” if the value was  $\leq 48$   $\mu\text{g/ml}$ . The parental MIC for tobramycin was considered high if  $\geq 2$   $\mu\text{g/ml}$  and low if  $\leq 1.5$   $\mu\text{g/ml}$ . The tobramycin concentrations used in ALE assays were considered high if  $\geq 2$   $\mu\text{g/ml}$  and low if  $\leq 1$   $\mu\text{g/ml}$ . The MICs’ fold change was calculated as the average of MICs of the strain evolved in presence of tobramycin, divided by the average of MICs of the same strain evolved without antibiotic. Resistome-related mutations in genes that were included: *oprD*, *pmrB*, *oprM*, *fusA*, *gyrB*, *mexA*, *mexX*, *mpl*, *gyrA*, *oprN*, *mexZ*, *ampC*, *mexS*, *mexY*, *armZ*, *mexB*, *ampR*, *parC* and *mexT*. TOB: tobramycin; FOF: fosfomycin.

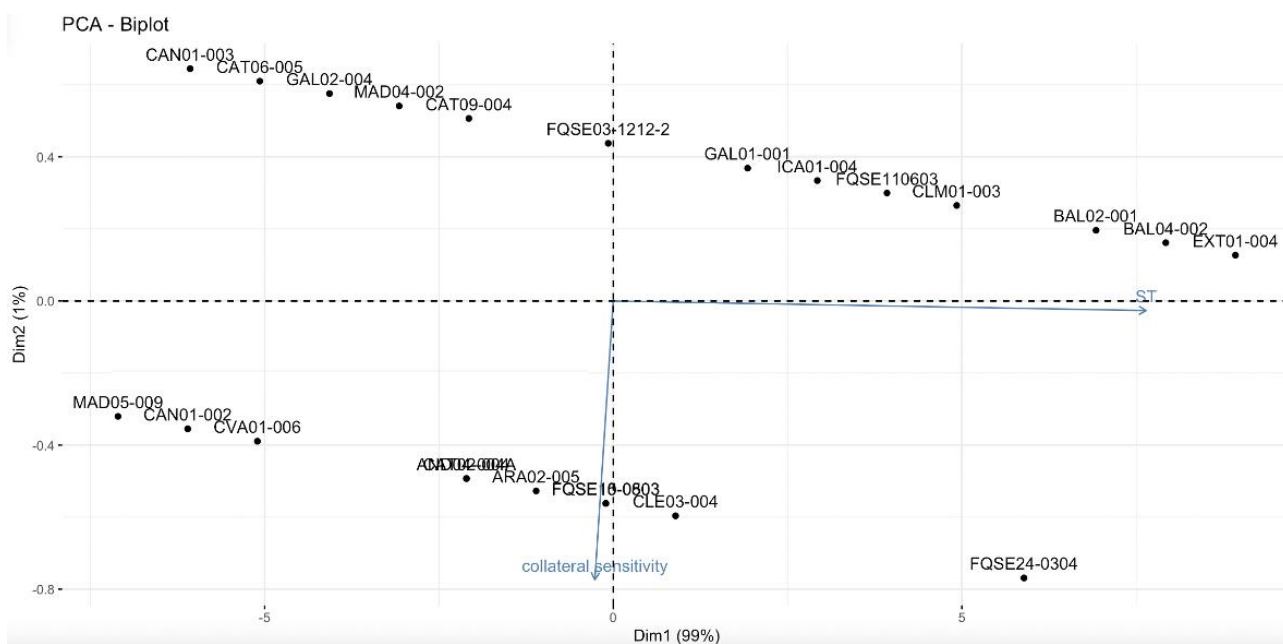

**Figure S2.** Principal component analysis of fosfomycin collateral sensitivity and sequence type (ST) as unique variables. The principal component analysis was done using as Dim1 the fosfomycin collateral sensitivity and the ST as Dim2. In the upper part of the biplot the strains that did not develop collateral sensitivity were plotted, whereas in the bottom there were the ones that developed said phenotype. The contribution to this division in two groups of the variable collateral sensitivity was 99%, while the one of the ST was 1%.
